# Supplementary material for: Multigene phylogenetics of Polycephalomyces (Ophiocordycipitaceae, Hypocreales), with two new species from Thailand
Source: PubMed Central journal article supplement (PMC6308235; doi:10.1038/s41598-018-36792-4), 2018-12-27
Supplement: 41598_2018_36792_MOESM1_ESM.pdf [file 41598_2018_36792_MOESM1_ESM.pdf]

1 **Multigene phylogenetics of *Polycephalomyces***  
2 **(Ophiocordycipitaceae, Hypocreales), with two new species from**  
3 **Thailand**

4

5 Yuan-Pin Xiao<sup>1,2,3</sup>, Ting-Chi Wen<sup>1\*</sup>, Sinang Hongsanan<sup>2</sup>, Rajesh Jeewon<sup>5</sup>, J. Jennifer  
6 Luangsa-ard<sup>4</sup>, Siraprapa Brooks<sup>3</sup>, Dhanushka Nadeeshan Wanasinghe<sup>2,3</sup>, Feng-Yao Long<sup>1</sup> &  
7 Kevin D. Hyde<sup>2,3</sup>

8

9 <sup>1</sup>Engineering Research Center of Southwest Bio-Pharmaceutical Resources, Ministry of Education,  
10 Guizhou University, Guiyang, Guizhou Province 550025, China

11 <sup>2</sup>Center of Excellence in Fungal Research, Mae Fah Luang University, Chiang Rai 57100, Thailand

12 <sup>3</sup>School of Science, Mae Fah Luang University, Chiang Rai 57100, Thailand

13 <sup>4</sup>Microbe Interaction and Ecology Laboratory, BIOTEC, NSTDA, 113 Thailand Science Park, Pathum  
14 Thani, 12120, Thailand

15 <sup>5</sup>Department of Health Sciences, Faculty of Science, University of Mauritius, Reduit, 80837, Mauritius

16 \*email: tingchiwen@yahoo.com

17

**Supplementary Table S1.** Sources of isolates and GenBank accession numbers used in the paper

| Current name               | Voucher        | SSU      | ITS      | LSU      | rpb2     | tef1     | rpb1     | References                       |
|----------------------------|----------------|----------|----------|----------|----------|----------|----------|----------------------------------|
| <i>O. agriotidis</i>       | ARSEF 5692     | DQ522540 | JN049819 | DQ518754 | DQ522418 | DQ522322 | DQ522368 | Kepler et al. <sup>53</sup>      |
| <i>O. barnesii</i>         | BCC 28560      | EU408776 |          |          | EU418599 |          | EU408773 | Luangsa-Ard et al. <sup>54</sup> |
| <i>O. barnesii</i>         | BCC 28561      | EU408775 |          |          | EU408772 |          | EU408774 | Luangsa-Ard et al. <sup>55</sup> |
| <i>O. barnesii</i>         | MFLU 17-1395   | MG266438 |          | MG266439 | MG271929 | MG271932 |          | This study                       |
| <i>O. brunneipunctata</i>  | OSC 128576     | DQ522542 |          | DQ518756 | DQ522420 | DQ522324 | DQ522369 | Spatafora et al. <sup>55</sup>   |
| <i>O. capitata</i>         | OSC 71233      | AY489689 |          |          | DQ522421 |          | AY489649 | Castlebury et al. <sup>37</sup>  |
| <i>O. cf. acicularis</i>   | OSC 128580     | DQ522543 |          | DQ518757 | DQ522423 | DQ522326 | DQ522371 | Spatafora et al. <sup>55</sup>   |
| <i>O. fracta</i>           | OSC 110990     | DQ522545 |          | DQ518759 | DQ522425 | DQ522328 | DQ522373 | Spatafora et al. <sup>55</sup>   |
| <i>O. japonica</i>         | OSC 110991     | DQ522547 | JN049824 | DQ518761 | DQ522428 | DQ522330 | DQ522375 | Spatafora et al. <sup>55</sup>   |
| <i>O. ophioglossoides</i>  | OSC 106405     | AY489691 |          |          | DQ522429 |          | AY489652 | Castlebury et al. <sup>37</sup>  |
| <i>O. ravenelii</i>        | OSC 110995     | DQ522550 |          | DQ518764 | DQ522430 | DQ522334 | DQ522379 | Spatafora et al. <sup>55</sup>   |
| <i>O. stylophora</i>       | OSC 111000     | DQ522552 | JN049828 | DQ518766 | DQ522433 | DQ522337 | DQ522382 | Spatafora et al. <sup>55</sup>   |
| <i>O. variabilis</i>       | ARSEF 5365     | DQ522555 |          | DQ518769 | DQ522437 |          | DQ522386 | Spatafora et al. <sup>55</sup>   |
| <i>P. agaricus</i>         | YHHPA1305      | KP276655 | KP276651 |          | KP276667 | KP276659 | KP276663 | Wang et al. <sup>9</sup>         |
| <i>P. agaricus</i>         | YHCPA1303      | KP276657 | KP276653 |          | KP276669 | KP276661 | KP276665 | Wang et al. <sup>9</sup>         |
| <i>P. aurantiacus</i>      | MFLUCC 17-2113 | MG136904 | MG136916 | MG136910 | MG136870 | MG136875 | MG136866 | This study                       |
| <i>P. aurantiacus</i>      | MFLUCC 17-2114 | MG136905 | MG136917 | MG136911 | MG136871 | MG136874 |          | This study                       |
| <i>P. aurantiacus</i>      | MFLU 17-1394   | MG136906 | MG136918 | MG136912 | MG136872 | MG136876 | MG136867 | This study                       |
| <i>P. aurantiacus</i>      | MFLU 17-1393   | MG136907 | MG136919 | MG136913 | MG136873 | MG136877 | MG136868 | This study                       |
| <i>P. formosus</i>         | ARSEF1424      | KF049615 | KF049661 | KF049634 | KF049671 | KF049689 | KF049651 | Kepler et al. <sup>5</sup>       |
| <i>P. kanzashianus</i>     |                |          | AB027371 |          |          |          |          | Nikoh et al. <sup>56</sup>       |
| <i>P. lianzhouensis</i>    | HIMGD20918     |          | EU149921 |          |          |          |          | Zhang et al. <sup>57</sup>       |
| <i>P. lianzhouensis</i>    | GIMYY9603      | KF226249 | EU149922 | KF226250 |          | KF226252 | KF226251 | Zhang et al. <sup>57</sup>       |
| <i>P. marginaliradians</i> | MFLU 17-1582   | MG136908 | MG136920 | MG136914 | MG271931 | MG136878 | MG136869 | This study                       |
| <i>P. marginaliradians</i> | MFLUCC 17-2276 | MG136909 | MG136921 | MG136915 | MG271930 | MG136879 |          | This study                       |
| <i>P. nipponicus</i>       | BCC:1682       | KF049620 | KF049664 | KF049638 |          | KF049694 |          | Kepler et al. <sup>5</sup>       |
| <i>P. nipponicus</i>       | NBRC:101406    | JN941753 | JN943301 | JN941388 |          |          | JN992487 | Schoch et al. <sup>58</sup>      |
| <i>P. onorei</i>           | BRA: CR23902   |          | KU898841 |          |          |          |          | Crous et al. <sup>10</sup>       |
| <i>P. onorei</i>           | BRA: CR23904   |          | KU898843 |          |          |          |          | Crous et al. <sup>10</sup>       |

| <b>Current name</b>        | <b>Voucher</b> | <b>SSU</b> | <b>ITS</b> | <b>LSU</b> | <b>rpb2</b> | <b>tef1</b> | <b>rpb1</b> | <b>References</b>                |
|----------------------------|----------------|------------|------------|------------|-------------|-------------|-------------|----------------------------------|
| <i>P. ramosopulvinatus</i> |                |            | AB027372   |            |             |             |             | Nikoh et al. <sup>56</sup>       |
| <i>P. ramosopulvinatus</i> | EFCC:5566      |            | KF049658   | KF049627   |             | KF049682    | KF049645    | Kepler et al. <sup>5</sup>       |
| <i>P. ramosus</i>          | RCEF6016       |            | KC782530   |            |             |             |             | Crous et al. <sup>10</sup>       |
| <i>P. ramosus</i>          | NBRC:109983    |            | AB925946   |            |             |             |             | Crous et al. <sup>10</sup>       |
| <i>P. sinensis</i>         | HMAS:43720     |            | NR_119928  | NG_042573  |             |             |             | Wang et al. <sup>6</sup>         |
| <i>P. tomentosus</i>       | BL4            | KF049623   | KF049666   | KF049641   | KF049678    | KF049697    | KF049656    | Kepler et al. <sup>5</sup>       |
| <i>P. yunnanensis</i>      | YHCPY1005      |            | KF977848   |            | KF977854    | KF977850    | KF977852    | Wang et al. <sup>8</sup>         |
| <i>P. yunnanensis</i>      | YHHPY1006      |            | KF977849   |            | KF977855    | KF977851    | KF977853    | Wang et al. <sup>8</sup>         |
| <i>Pu. lilacinum</i>       | CBS 284.36     | NG_061025  | NR_111432  |            |             |             |             | Luangsa-Ard et al. <sup>62</sup> |
| <i>Pu. lilacinum</i>       | CBS 431.87     |            | HQ842812   |            | EF468940    | EF468791    | EF468897    | Luangsa-Ard et al. <sup>63</sup> |

19  
20  
21  
22  
23  
24  
25  
26  
27  
28  
29  
30  
31  
32  
33  
34  
35  
36  
37  
38  
39

40 **Supplementary Table S2.** Morphological comparison of asexual morph species of the genus *Polycephalomyces*

| Species                    | Host                                    | Habitat            | Synnemata (mm)                                                                                                                                                      | Phialides ( $\mu\text{m}$ )                                                                                                                                                                                                                                                                                                 | Conidia ( $\mu\text{m}$ )                                                                                                                                                            | Reference                |
|----------------------------|-----------------------------------------|--------------------|---------------------------------------------------------------------------------------------------------------------------------------------------------------------|-----------------------------------------------------------------------------------------------------------------------------------------------------------------------------------------------------------------------------------------------------------------------------------------------------------------------------|--------------------------------------------------------------------------------------------------------------------------------------------------------------------------------------|--------------------------|
| <i>P. aurantiacus</i>      | Coleopteran larvae & <i>O. barnesii</i> | Buried in the soil | Emerging after 30 days, solitary or not solitary, branched or unbranched, 1.3–2.2 long, showing 1–2 radiating ring-like distributions                               | $\alpha$ -phialides 10.4–18.3 $\times$ 0.8–1.8, narrowly lageniform. $\beta$ -phialides 22.9–64.2 $\times$ 1–1.5, lanceolate or narrowly lageniform                                                                                                                                                                         | $\alpha$ -conidia 1.8–2.2 $\times$ 1.4–1.9 globose to subglobose, yellow slimy in mass. $\beta$ -conidia 3.2–3.9 $\times$ 1.4–1.8 fusiform, one-celled, catenate                     | This study               |
| <i>P. marginaliradians</i> | On a Cossidae larva                     | Buried in the soil | Emerging after 14 days, single or branched into 2 or 3 branched, 3.2–4.6 long, showing 1–2 radiating ring-like distributions                                        | $\alpha$ -phialides 11–14.4 $\times$ 1.2–1.8, elongated lageniform, caespitose, palisade-like, monoverticillate, branched into 2 phialides, 3 branched on one metula; $\beta$ -phialides 12.8–23.9 $\times$ 1.8–2.7, solitary, growing from hyphae, narrow slender to narrow lageniform, with or without metula at the base | $\alpha$ -conidia 1.9–2.6 $\mu\text{m}$ diam, globose, catenate, one-celled, pale yellow slimy in mass. $\beta$ -conidia 3.1–3.9 $\times$ 1.6–2.1 $\mu\text{m}$ fusiform, one-celled | This study               |
| <i>P. agaricus</i>         | Ophiocordyceps sp. & melolonthid larvae | Buried in the soil | Solitary, unbranched, agaricshaped, size (0.34– 1.2 $\times$ 0.11–0.42); conidial mass pileus-like, light yellow to pale brown, size (0.08–0.25 $\times$ 0.36–0.99) | $\alpha$ -phialides lanceolate, length (30.7–81.9), base width (1.3–2.4), neck width (0.5–1.1); $\beta$ -phialides narrowly lageniform or subulate, length (4.9–28.6), base width (1.8–3), neck width (0.4–0.8)                                                                                                             | $\alpha$ -conidia globose to subglobose, size (2–3.1 $\times$ 1.8–2.9); $\beta$ -conidia fusiform, catenate or clump together, size (3.8–6.8 $\times$ 1.7–3.2)                       | Wang et al. <sup>9</sup> |

| Species                 | Host                                    | Habitat                         | Synnemata (mm)                                                                                                                                                                                                                                                                                     | Phialides ( $\mu\text{m}$ )                                                                                                                                                    | Conidia ( $\mu\text{m}$ )                                                                                                  | Reference                                             |
|-------------------------|-----------------------------------------|---------------------------------|----------------------------------------------------------------------------------------------------------------------------------------------------------------------------------------------------------------------------------------------------------------------------------------------------|--------------------------------------------------------------------------------------------------------------------------------------------------------------------------------|----------------------------------------------------------------------------------------------------------------------------|-------------------------------------------------------|
| <i>P. ditmarii</i>      | On <i>Paravespula vulgaris</i>          |                                 | 2 to 3 distinct branches, 15–25 long, yellowish-white, darkening at the base; Each branch is surmounted by a small subsurface capitulum, 0.5–1 in diameter, with an irregular surface, dotted with numerous small blisters of orange-yellow color, more or less covered with a fine whitish powder | Elongated, cylindrical, attenuating at the top, measuring 20–37 $\times$ 1.5–2.5 (3)                                                                                           | Conidia globose to subglobose, smooth, hyaline, measuring 2.2–3 (3.4) $\times$ 1.3–1.6                                     | Van Vooren et al. <sup>28</sup>                       |
| <i>P. formosus</i>      | Coleopteran larvae & <i>O. barnesii</i> | On the ground or buried in soil | Solitary, caespitose, branched or unbranched, up to 20 $\times$ 0.38 in size, conidial mass light yellow to caramel brown, diam (up to 0.15)                                                                                                                                                       | Cylindrical, subulate, length (10–15), base width (1.5–2), neck width (ca. 0.5)                                                                                                | $\alpha$ -conidia ovoid, size (2–2.8 $\times$ 1.6–2); $\beta$ -conidia fusiform, catenate, size (3.2–4.8 $\times$ 0.8–1.6) | Seifert <sup>16</sup> , Bischoff et al. <sup>17</sup> |
| <i>P. lianzhouensis</i> | On a Lepidoptera larva                  | In fallen leaves.               | Unbranched or dichotomously branched, 10–20 tall, 0.5–1.5 wide, conidial mass not seen                                                                                                                                                                                                             | In whorls or intercalary and terminal, terminally awl-shaped, length (6–12), base width (1.3–1.7), neck width (0.5–0.8)                                                        | Ellipsoidal, oblong to cylindrical, size (5–7 $\times$ 1.3–1.6)                                                            | Wang et al. <sup>7</sup>                              |
| <i>P. paludosus</i>     | On a Lepidoptera larva                  |                                 | Capitate, 10–20 long 0.5–0.8 thick, cinnamon brown, branched, the branches at right angles, 1–4 long, 0.1–0.2, thick, the branches and the upper portions of the stems slightly pulverulent                                                                                                        | Subulate, 12–20 long, 1–1.5 wide at the base, phialides occurring scattered on the branches below the heads, ventricose, occasionally stellate above, 10.5–14.7 $\times$ 1.5–2 | Conidia produced singly, hyaline, obovoid, 1.8–2.5 $\times$ 1.1–1.3 $\mu\text{m}$ covered by a mucus, agglutinating.       | Mains <sup>29</sup>                                   |

| Species              | Host                                               | Habitat                                               | Synnemata (mm)                                                                                                                                                                | Phialides ( $\mu\text{m}$ )                                                                                                                                                                                                                            | Conidia ( $\mu\text{m}$ )                                                                                                                                                                                            | Reference                                             |
|----------------------|----------------------------------------------------|-------------------------------------------------------|-------------------------------------------------------------------------------------------------------------------------------------------------------------------------------|--------------------------------------------------------------------------------------------------------------------------------------------------------------------------------------------------------------------------------------------------------|----------------------------------------------------------------------------------------------------------------------------------------------------------------------------------------------------------------------|-------------------------------------------------------|
| <i>P. ponerae</i>    | Ant ( <i>Ponera Latreille</i> )                    | In an ant nest                                        | Simple, 5–10 long, 0.23–0.3 wide, emerged from multiple sites on host, fawn brown at base, white on the top, without obviously inflated ball, secondary synnemata cylindrical | $\alpha$ -phialides awl-formed (7.6–11.9 $\times$ 1.1), mostly on the top of synnemata; $\beta$ -phialides <i>Akanthomyces</i> -like, slightly inflated at base, tapering up into a slender neck, 5.4–11.9 $\times$ 2.2, always on the middle of stipe | $\alpha$ -conidia ellipsoidal (2.2–3.2 $\times$ 1.1), aggregate into distinct glutinous spore mass; $\beta$ -conidia ellipsoidal to cylindrical or fusiform (2.2–4.3 $\times$ 1.1), forming dry conidial short chain | Liang et al. <sup>11</sup>                            |
| <i>P. ramosus</i>    | Lepidopteran larvae & <i>Hirsutella guignardii</i> | On the ground or buried in soil, often found in caves | Solitary, crowded or caespitose, unbranched or branched, a size of up to 20 $\times$ 1, conidial mass yellow to orange-yellow, diam (0.15–1)                                  | $\alpha$ -phialides cylindrical to narrowly lageniform, length (7–24), base width (1–2), neck width ( <i>ca.</i> 0.5); $\beta$ -phialides narrowly lageniform or subulate, length (6–27), base width (2–3.5), neck width (0.5–1)                       | $\alpha$ -conidia ovoid, size (2.4–3.2 $\times$ 1.6–2.4); $\beta$ -conidia fusiform, catenate, size (3.2–4 $\times$ 1.6–2)                                                                                           | Seifert <sup>16</sup> , Bischoff et al. <sup>17</sup> |
| <i>P. sinensis</i>   | Lepidopteran larvae & <i>O. sinensis</i>           | Buried in soil                                        | Solitary, crowded, branched or unbranched, a length of up to 50–60 in culture, conidial mass yellow or yellow-orange                                                          | Lanceolate or narrowly lageniform, length (12.5–66), base width (1.4–3.5), neck width (0.6–1.8)                                                                                                                                                        | $\alpha$ -conidia ovoid, size (1.7–2.6 $\times$ 1.3–2); $\beta$ -conidia fusiform, catenate or clump together, size (3.3–4.5 $\times$ 1.3–2)                                                                         | Chen et al. <sup>18</sup> , Wang et al. <sup>6</sup>  |
| <i>P. tomentosus</i> | On myxomycetes                                     |                                                       | Fructification a synnema                                                                                                                                                      |                                                                                                                                                                                                                                                        | Conidia globose, 0.7–1 $\mu\text{m}$ diam                                                                                                                                                                            | Seifert <sup>16</sup>                                 |

| Species               | Host                                    | Habitat       | Synnemata (mm)                                                                                                                                                               | Phialides ( $\mu\text{m}$ )                                                                                                                                                                                                                     | Conidia ( $\mu\text{m}$ )                                                                                                                                                         | Reference                |
|-----------------------|-----------------------------------------|---------------|------------------------------------------------------------------------------------------------------------------------------------------------------------------------------|-------------------------------------------------------------------------------------------------------------------------------------------------------------------------------------------------------------------------------------------------|-----------------------------------------------------------------------------------------------------------------------------------------------------------------------------------|--------------------------|
| <i>P. yunnanensis</i> | Hemipteran adults<br>& <i>O. nutans</i> | On the ground | Solitary, caespitose or crowded,<br>branched or unbranched, size (0.7–<br>1.4 $\times$ 0.05–1.2); conidial mass white<br>to yellow-brown, size (0.2–1.5 $\times$<br>0.2–1.4) | $\alpha$ -phialides cylindrical to<br>subulate, length (20.1–57.8),<br>base width (1–2.3), neck width<br>(0.5–1.3); $\beta$ -phialides narrowly<br>lageniform or subulate, length<br>(7.1–30.6), base width (2.3–<br>3.7), neck width (0.5–1.1) | $\alpha$ -conidia subglobose,<br>ellipsoidal, size (1.4–2.5<br>$\times$ 1.2–2.2); $\beta$ -conidia<br>fusiform, catenate or<br>clump together, size<br>(2.8–5.7 $\times$ 1.1–2.7) | Wang et al. <sup>8</sup> |

41

42

43

44

45

46

47

48

49

50

51

52

**Supplementary Table S3.** Morphological comparison of sexual morph species of the genus *Polycephalomyces*

| Species                    | Host                          | Habitat            | Stromata                                                                                    | Stipe (mm)                                                                      | Fertile part (mm)                                                                                                          | Perithecia ( $\mu\text{m}$ )                                                         | Asci ( $\mu\text{m}$ )                                                                          | Ascospores ( $\mu\text{m}$ )                                    | Part-spores ( $\mu\text{m}$ )                  | Reference                          |
|----------------------------|-------------------------------|--------------------|---------------------------------------------------------------------------------------------|---------------------------------------------------------------------------------|----------------------------------------------------------------------------------------------------------------------------|--------------------------------------------------------------------------------------|-------------------------------------------------------------------------------------------------|-----------------------------------------------------------------|------------------------------------------------|------------------------------------|
| <i>P. marginaliradians</i> | On larvae of <i>Cossidae</i>  | Buried in the soil | 30–35 long, 2–4.5 mm diam, mostly single, stipitate, unbranched or branched brown to yellow | Cylindrical, 1–20 long, 2–3 diam, brown to yellow, with one or two fertile head | 4–4.2 long, 0.3–0.45 diam, capitate, lateral, globose to subglobose, pale yellow to yellow, with protruding ostiolar necks | 676–803 $\times$ 246–328, immersed, yellow, flask-shaped                             | 459–556 $\times$ 3.1–4.3, 8-spored, hyaline, filiform, with 1.4–2.5 $\times$ 2.2–3.2 apical cap | As long as the asci, easily breaking into part-spores, filiform | 3.2–4.2 $\times$ 1.3–1.7 cylindrical, straight | This study                         |
| <i>P. kanzashianus</i>     | On <i>Cicadidae</i>           |                    | Stipitate, branched, polycephalous                                                          | Cylindrical, 30 long, 3–5 diam, leather, rough, terminal branched               | Apical or spherical, 2–5 in diam., yellow, small                                                                           | Entirely immersed, flask-shaped, 900–1050 $\times$ 270–300                           | Asci 3 $\mu\text{m}$ thick, apical cap 3 $\mu\text{m}$ diam                                     | Break into part-spores                                          | 3–5 $\times$ 1 both truncate                   | Kobayasi and Shimizu <sup>59</sup> |
| <i>P. lianzhouensis</i>    | On a <i>Lepidoptera</i> larva | In fallen leaves.  | Numerous, simple, fleshy, arising from the head, abdomen, and back of the host              | Cylindrical, reddish brown or cinnamon colored, 2–12 long, 0.5–1 wide           | Hemispherical or capiform, pale yellow or pale yellowish brown, acrogenous, 1–2 wide, 1 high                               | Narrowly ovoid with protruding apices, vertically immersed, 355–473 $\times$ 158–197 | Asci: cylindrical, 89–194 $\times$ 2–4; caps: hemispherical, 2–3 thick, 2 high                  | Filiform, break into part-spores                                | Cylindrical, 3.9–7.8 $\times$ 1                | Wang et al. <sup>7</sup>           |



| Species                    | Host                      | Habitat                                                 | Stromata                                                                                                                                                                               | Stipe (mm)                                                                                  | Fertile part (mm)                                                                                       | Perithecia (µm)                                                          | Asci (µm)                                | Ascospores (µm)                                | Part-spores (µm)                             | Reference                          |
|----------------------------|---------------------------|---------------------------------------------------------|----------------------------------------------------------------------------------------------------------------------------------------------------------------------------------------|---------------------------------------------------------------------------------------------|---------------------------------------------------------------------------------------------------------|--------------------------------------------------------------------------|------------------------------------------|------------------------------------------------|----------------------------------------------|------------------------------------|
| <i>P. nipponicus</i>       | On Cicadidae              | Buried in the soil                                      | Solitary or arranged in twos or threes 20–70 mm in height, often highly branched and polycephalous                                                                                     | Cylindrical simplex, irregularly branched sometimes base has two parts                      | Terminal or lateral, depressed, fleshy, sometimes crowded, 1–2.5. in diam                               | Immersed flask-shaped or ovoid, 800–950 × 300–370                        |                                          | Filiform, disarticulating into part-spores     | 2.8–4.8 × 0.7 truncate                       | Kobayasi <sup>60</sup>             |
| <i>P. onorei</i>           | On caterpillar (Arctinae) | Buried in soil, half buried, or among leaves and debris | Numerous, solitary, simple or 2–3 times branched, 10–25 × 0.5–1.5 mm, ampulliform, thickened at the base, cinnamon brown, darker when wet, fading with age and drying to greyish brown | Cylindrical                                                                                 | Subapical, forming lateral pads around stipe, pale brown to ochraceous orange, with sterile apical part | Immersed, 854–950 × 330–395, pyriform, with dark brown protruding apices | Asci 450–510 long                        | Filiform, cylindrical, breaking to part-spores | (3.5–)4(–5.5) × 0.5–1, truncate, bacilliform | Crous et al. <sup>10</sup>         |
| <i>P. ramosopulvinatus</i> | Nymph of Cicada           |                                                         | Stroma 100 mm long                                                                                                                                                                     | Cylindrical, leathery, 3.6–4.5 wide, apically branching, glabrous, pallid ochreous in color | Fertile area cushion shaped to globose, with aggregated perithecia forming composite heads              | Pyriform, 750–925 × 275–300                                              | 3.5–5 wide, with apical cap diameter 3–5 | Filiform, disarticulating into partspores      | 3 × 1 truncate                               | Kobayasi and Shimizu <sup>59</sup> |

55 **Supplementary Table S4.** Primers used for current study and optimized PCR protocols

| Locus         | Primers                                                                                  | Optimised PCR protocols                                     | Approximate size of the PCR amplicons obtained | References                      |
|---------------|------------------------------------------------------------------------------------------|-------------------------------------------------------------|------------------------------------------------|---------------------------------|
| ITS           | ITS4:<br>5'-TCCTCCGCTTATTGATATGC-3'<br>ITS5:<br>5'-GGAAGTAAAAGTCGTAACAAGG-3'             | (94 °C: 30 s, 51 °C : 50 s, 72 °C: 45 s) × 33 cycles        | 500 bp                                         | White et al. <sup>34</sup>      |
| SSU           | NS1:<br>5'-GTAGTCATATGCTTGTCTC-3'<br>NS4:<br>5'-CTTCCGTCAATTCCTTTAAG-3'                  | (94 °C: 30 s, 51 °C : 1 min, 72 °C: 2 min) × 33 cycles      | 1000 bp                                        | Sung et al. <sup>61</sup>       |
| LSU           | LROR:<br>5'-ACCCGCTGAACTTAAGC-3'<br>LR5:<br>5'-TCCTGAGGGAAACTTCG-3'                      | (94 °C: 30 s, 51 °C : 1 min, 72 °C: 2 min) × 33 cycles      | 800 bp                                         | Sung et al. <sup>61</sup>       |
| EF1- $\alpha$ | EF1-983F:<br>5'-GCYCCYGGHCAYCGTGAYTTYAT-3'<br>EF1-2218R:<br>5'-ATGACACCRACRGCRCRGTGTG-3' | (94 °C: 30 s, 58 °C : 1 min 20 s, 72 °C: 1 min) × 33 cycles | 1000 bp                                        | Castlebury et al. <sup>37</sup> |
| RPB1          | CRPB1A:<br>5'-CAYCCWGGYTTYATCAAGAA-3'<br>RPB1Cr:<br>5'-CCNGCDATNTCRTRTCCATRTA-3'         | (94 °C: 30 s, 55 °C : 30 s, 72 °C: 1 min) × 33 cycles       | 800 bp                                         | Castlebury et al. <sup>37</sup> |
| RPB2          | fRPB2-5f:<br>5'-GAYGAYMGWGATCAYTTYGG-3'<br>fRPB2-7cR:<br>5'-CCCATRGCCTTGYYTTRCCCAT-3'    | (94 °C: 30 s, 54 °C : 40 s, 72 °C: 1 min 20 s) × 33 cycles  | 1000 bp                                        | Sung et al. <sup>36</sup>       |

56

57

58
